# Supplementary material for: Ionic liquids as amphiphile self-assembly media
Source: Royal Society of Chemistry journal article supplement (doi:10.1039/b801395k), 2008-01-01
Supplement: b801395k.pdf [file b801395k.pdf]

**Electronic supplementary information (ESI) for:**

**Ionic liquids as amphiphile self-assembly media**

Tamar L. Greaves and Calum J. Drummond

**Table S1** Transfer of nonpolar gases to EAN or water, where  $\Delta G^\circ$  is the free energy of transfer,  $\Delta H^\circ$  is the enthalpy change, T the temperature and  $\Delta S^\circ$  the change in entropy. (Reproduced from ref. 17, with permission. Copyright 1982, Elsevier)

|                                             |       | $\Delta G$ (Kcal) | $\Delta H$ (Kcal) | $\Delta S$ (cal/K) |
|---------------------------------------------|-------|-------------------|-------------------|--------------------|
| Kr                                          | EAN   | 1.6               | -0.9              | -9                 |
|                                             | water | 2.8               | -2.9              | -19                |
| CH <sub>4</sub>                             | EAN   | 1.6               | -0.5              | -4                 |
|                                             | water | 2.9               | -2.7              | -18                |
| C <sub>2</sub> H <sub>6</sub>               | EAN   | 2.0               | -1.0              | -10                |
|                                             | water | 3.9               | -2.1              | -20                |
| C <sub>4</sub> H <sub>10</sub> <sup>a</sup> | EAN   | (3.61)            | (-5.71)           | (-31.3)            |
|                                             | water | (6.35)            | (-6.21)           | (-42.1)            |

<sup>a</sup> Transfer from butane gas phase to EAN or water.

**Table S2** Aggregation numbers and hydrodynamic radii for micelles of amphiphiles in ILs, water or formamide.

| Surfactant                         | Solvent                | Aggregation No.                  | Hydrodynamic Radii (nm)          |
|------------------------------------|------------------------|----------------------------------|----------------------------------|
| C <sub>14</sub> PyrB               | EAN                    | 17±1 <sup>a,18</sup>             | 1.4±3 <sup>18</sup>              |
|                                    | water                  | 81 <sup>b,75</sup>               |                                  |
| C <sub>16</sub> PyrB               | EAN                    | 26±2 <sup>a,18</sup>             | 2.2±3 <sup>18</sup>              |
|                                    | water                  | 111 <sup>b,75</sup>              |                                  |
| C <sub>16</sub> MImCl              | EAN                    |                                  | 119.2 <sup>c,82</sup>            |
|                                    | water                  |                                  | 87.6 <sup>c,82</sup>             |
| C <sub>16</sub> MImBF <sub>4</sub> | EAN                    |                                  | 105.2 <sup>c,82</sup>            |
|                                    | water                  |                                  | 55.4 <sup>c,82</sup>             |
| C <sub>16</sub> E <sub>8</sub>     | BMIm BF <sub>4</sub>   | ~145 <sup>a,83</sup>             | 3.2±0.4 <sup>a,83</sup>          |
|                                    | Water                  | 150±15 <sup>a,d,83</sup>         | 3.7 <sup>a,d,83</sup>            |
|                                    | formamide              | ~4 <sup>d,e,83</sup>             |                                  |
| C <sub>14</sub> E <sub>8</sub>     | BMIm BF <sub>4</sub>   | ~75 <sup>a,83</sup>              | 2.5±0.3 <sup>a,83</sup>          |
|                                    | BMIm PF <sub>6</sub>   | ~15 <sup>a,83</sup>              | 1.4±0.1 <sup>a,83</sup>          |
|                                    | BMIm Tf <sub>2</sub> N | No aggregation <sup>a,83</sup>   | No aggregation <sup>a,83</sup>   |
| C <sub>12</sub> E <sub>8</sub>     | BMIm BF <sub>4</sub>   | ~20 <sup>a,83</sup>              | 1.6±0.1 <sup>a,83</sup>          |
|                                    | Water                  | 95±5 <sup>a,d,83</sup>           | ~3.1 <sup>a,d,83</sup>           |
| C <sub>12</sub> E <sub>6</sub>     | BMIm BF <sub>4</sub>   | ~75 <sup>a,83</sup>              | 2.3±0.1 <sup>a,d,83</sup>        |
|                                    | Water                  | 140±15 <sup>a,d,83</sup>         | ~3.2 <sup>a,d,83</sup>           |
|                                    | formamide              | ~30 <sup>a,d,83</sup>            | ~2 <sup>a,c,83</sup>             |
| C <sub>12</sub> E <sub>4</sub>     | BMIm BF <sub>4</sub>   | No aggregation <sup>a,f,83</sup> | No aggregation <sup>a,f,83</sup> |
|                                    | Water                  | 165±62 <sup>d,g,83</sup>         |                                  |
|                                    | formamide              |                                  | ~2 <sup>a,d,83</sup>             |

<sup>a</sup> 25°C

<sup>b</sup> 30°C

<sup>c</sup> These reported values seem unrealistically large.

<sup>d</sup> From references within the reference.

<sup>e</sup> 40°C

<sup>f</sup> Cloud point reached at 25°C.

<sup>g</sup> 0°C

**Table S3** Phospholipid aggregate structure formation in ionic liquids. Temperatures in °C.

| Lipid             | Solvent | Phospholipid concentration | Phase 1                              | Transition Temp. 1 (°C) | Phase 2                     | Transition Temp. 2 (°C) | Phase 3                     | Transition Temp. 3 (°C) | Phase 4        | Ref     |
|-------------------|---------|----------------------------|--------------------------------------|-------------------------|-----------------------------|-------------------------|-----------------------------|-------------------------|----------------|---------|
| DSPC              | EAN     | 1:1 by wt.                 | L <sub>β</sub> <sup>1</sup> , 5.9 nm | 56.7                    | P <sub>β</sub> <sup>1</sup> | 57.3                    | L <sub>α</sub> , 6.3nm      |                         |                | 85      |
| DSPC              | Water   |                            | L <sub>β</sub> <sup>1</sup> , 6.4 nm | 51.5                    |                             | 54.9                    | L <sub>α</sub>              |                         |                | 176,177 |
| DSPC <sup>a</sup> | EAN     | 20% w/v                    | L <sub>c</sub>                       | 68.9                    | L <sub>α</sub>              |                         |                             |                         |                | 57      |
| DSPC <sup>a</sup> | Water   | 20% w/v                    | L <sub>c</sub>                       | 26.7                    | L <sub>β</sub> <sup>1</sup> | 50.2                    | P <sub>β</sub> <sup>1</sup> | 53.9                    | L <sub>α</sub> | 57      |
| DPPC              | EAN     | 29 wt%                     | L <sub>α</sub>                       | 59.5                    | Micellar                    |                         |                             |                         |                | 56      |
| DPPC <sup>a</sup> | EAN     | 20% w/v                    | L <sub>c</sub>                       | 58                      | H <sub>2</sub>              |                         |                             |                         |                | 94      |

|                   |       |         |                |      |                             |      |                             |       |                |    |
|-------------------|-------|---------|----------------|------|-----------------------------|------|-----------------------------|-------|----------------|----|
| DPPC <sup>b</sup> | EAN   | 20% w/v | L <sub>c</sub> | ~45  | L <sub>α</sub>              | ~55  | H <sub>2</sub>              |       |                | 94 |
| DPPC <sup>a</sup> | EAN   | 20% w/v | L <sub>c</sub> | 53.8 | L <sub>α</sub>              | 58.6 | H <sub>2</sub>              |       |                | 57 |
| DPPC <sup>a</sup> | Water | 20% w/v | L <sub>c</sub> | 20.7 | L <sub>β</sub> <sup>r</sup> | 35.0 | P <sub>β</sub> <sup>r</sup> | 41.0  | L <sub>α</sub> | 57 |
| DPPE <sup>a</sup> | Water | 20% w/v | sub-gel        | 36   | gel                         | 63   | L <sub>β</sub>              | 123   | H <sub>2</sub> | 95 |
| DPPE <sup>a</sup> | EAN   | 20% w/v | sub-gel        | 39   | gel                         | 67   | L <sub>β</sub>              | 73-77 | H <sub>2</sub> | 95 |
| DPPE <sup>a</sup> | EAN   | 20% w/v |                |      | pregel                      | 38.9 | gel                         | 56.7  | L <sub>β</sub> | 57 |
| DPPE <sup>a</sup> | Water | 20% w/v | subgel         | 25.9 | pregel                      | 38.2 | gel                         | 63.8  | L <sub>β</sub> | 57 |
| DPPG <sup>a</sup> | EAN   | 20% w/v | L <sub>c</sub> | 46.9 | L <sub>β</sub>              |      |                             |       |                | 57 |
| DPPG <sup>a</sup> | Water | 20% w/v | subgel         | 23.2 | gel                         | 38.5 | L <sub>β</sub>              | 41.2  | L <sub>α</sub> | 57 |
| DPPA <sup>a</sup> | EAN   | 20% w/v | L <sub>c</sub> | 91.7 | H <sub>2</sub>              |      |                             |       |                | 57 |
| DPPA <sup>a</sup> | Water | 20% w/v | L <sub>c</sub> | 63.4 | L <sub>α</sub>              |      |                             |       |                | 57 |
| DLPC <sup>a</sup> | EAN   | 20% w/v | L <sub>c</sub> | 27.2 | c                           |      |                             |       |                | 57 |
| DLPC <sup>a</sup> | Water | 20% w/v | L <sub>c</sub> | -3.2 | gel state                   | 0.6  |                             |       |                | 57 |
| DMPC <sup>a</sup> | EAN   | 20% w/v | L <sub>c</sub> | 42.5 | c                           |      |                             |       |                | 57 |
| DMPC <sup>a</sup> | Water | 20% w/v | L <sub>c</sub> | 15.6 | L <sub>β</sub> <sup>r</sup> | 24.0 | P <sub>β</sub> <sup>r</sup> |       |                | 57 |

<sup>a</sup> Initial heating, after sample equilibrated at 0 °C for 4-7 days.

<sup>b</sup> Reheating sample, after previously cycled above main transition.

<sup>c</sup> Nonlamellar phase, including H<sub>2</sub> and micellar.

**Table S4** Summary of microemulsion systems involving ILs. IL/O, O/IL refer to IL-in-oil and oil-in-IL respectively.

| Solvent<br>IL                                          | phase 1: | Solvent phase 2               | Amphiphile                                               | Microemulsion                                                      | Liquid Crystal Phases                                                 | Ref     |
|--------------------------------------------------------|----------|-------------------------------|----------------------------------------------------------|--------------------------------------------------------------------|-----------------------------------------------------------------------|---------|
| EAN                                                    |          | Various alkanes <sup>a</sup>  | Various surfactants <sup>b</sup>                         | C <sub>n</sub> E <sub>m</sub>                                      |                                                                       | 129     |
| TMGA                                                   |          | Supercritical CO <sub>2</sub> | <i>N</i> -EtFOSA                                         | IL/supercritical CO <sub>2</sub>                                   |                                                                       | 130     |
| TMGL                                                   |          | Supercritical CO <sub>2</sub> | <i>N</i> -EtFOSA                                         | IL/supercritical CO <sub>2</sub>                                   |                                                                       | 130     |
| TMGTFA                                                 |          | Supercritical CO <sub>2</sub> | <i>N</i> -EtFOSA                                         | IL/supercritical CO <sub>2</sub>                                   |                                                                       | 130     |
| BMIm BF <sub>4</sub>                                   |          | cyclohexane                   | Tx-100                                                   | IL/oil                                                             | Homogeneous ellipsoid particles                                       | 120     |
| BMIm BF <sub>4</sub>                                   |          | cyclohexane                   | TX-100                                                   | IL/O, bicontinuous and O/IL <sup>c</sup>                           | Droplets from 15-80nm for IL/O                                        | 111     |
| BMIm BF <sub>4</sub>                                   |          | cyclohexane                   | TX-100                                                   | IL/O                                                               |                                                                       | 121     |
| BMIm BF <sub>4</sub>                                   |          | toluene                       | TX-100                                                   | IL/O, bicontinuous and O/IL <sup>c</sup>                           |                                                                       | 114,119 |
| BMIm PF <sub>6</sub>                                   |          | toluene                       | TX-100                                                   | IL/O, bicontinuous and O/IL <sup>c</sup>                           |                                                                       | 113     |
| BMIm BF <sub>4</sub>                                   |          | benzene                       | TX-100                                                   | IL/O, bicontinuous and O/IL <sup>c</sup>                           |                                                                       | 117,118 |
| BMIm BF <sub>4</sub>                                   |          | p-xylene                      | TX-100                                                   | IL/O, bicontinuous and O/IL <sup>c</sup>                           |                                                                       | 115     |
| BMIm PF <sub>6</sub>                                   |          | ethylene glycol               | TX-100                                                   | IL/O, bicontinuous and O/IL <sup>c</sup>                           |                                                                       | 123     |
| BMIm PF <sub>6</sub>                                   |          | water                         | TX-100                                                   | Water/IL, for water <33%,<br>IL/water for water >65%. <sup>c</sup> | 33%<water<65%<br>bicontinuous<br>microemulsion.<br>Spherical droplets | 112     |
| BMIm PF <sub>6</sub>                                   |          | water                         | TX-100                                                   | IL/water                                                           |                                                                       | 126     |
| BMIm PF <sub>6</sub>                                   |          | water                         | TX-100                                                   | water/IL                                                           |                                                                       | 135     |
| BMIm PF <sub>6</sub>                                   |          | water                         | Tween 20                                                 | IL/water, bicontinuous and<br>water/IL <sup>c</sup>                |                                                                       | 116     |
| C <sub>6</sub> MIm PF <sub>6</sub>                     |          | perfluorohexane               | (CF <sub>2</sub> ) <sub>2</sub> CF <sub>3</sub> MIm (IL) | PF <sub>6</sub> O/IL                                               |                                                                       | 137     |
| C <sub>6</sub> MIm PF <sub>6</sub>                     |          | perfluorohexane               | (CF <sub>2</sub> ) <sub>2</sub> CF <sub>3</sub> BIm (IL) | PF <sub>6</sub> O/IL                                               |                                                                       | 137     |
| C <sub>6</sub> MIm PF <sub>6</sub>                     |          | perfluorohexane               | (CF <sub>2</sub> ) <sub>2</sub> CF <sub>3</sub> MIm (IL) | PF <sub>6</sub> O/IL                                               |                                                                       | 137     |
| C <sub>6</sub> MIm PF <sub>6</sub>                     |          | perfluorohexane               | (CF <sub>2</sub> ) <sub>2</sub> CF <sub>3</sub> BIm (IL) | PF <sub>6</sub> O/IL                                               |                                                                       | 137     |
| BMIm PF <sub>6</sub>                                   |          | PAN                           | AOT                                                      | IL/IL                                                              |                                                                       | 128     |
| ethylenediamine/<br>ammonia/<br>potassium <sup>d</sup> |          | decane                        | SDS                                                      |                                                                    |                                                                       | 122     |
|                                                        |          | <sup>e</sup>                  |                                                          |                                                                    |                                                                       | 132     |
| Water, oil and IL <sup>g</sup>                         |          |                               |                                                          |                                                                    |                                                                       | 138     |

<sup>a</sup> octane, decane, dodecane or tetradecane.

<sup>b</sup> C<sub>8</sub>E<sub>2</sub>, C<sub>12</sub>E<sub>3</sub> or C<sub>14</sub>E<sub>4</sub>.

<sup>c</sup> phase diagram in paper.

<sup>d</sup> molten salt.

<sup>e</sup> Solvent phase 1: IL in water microemulsion stabilised by a non-ionic surfactant.

<sup>f</sup> Solvent phase 2: lamellar liquid crystal of the same IL and surfactant in water.

<sup>g</sup> Emulsions were prepared with the IL present as either the continuous or non-continuous phase. Coated silica nanoparticles were used to stabilise the emulsions.
